1           **Cardio-centric hemodynamic management improves spinal cord oxygenation and**  
2                           **mitigates hemorrhage in acute spinal cord injury**

3  
4   Alexandra M. Williams, PhD<sup>1,2</sup>, Neda Manouchehri, BSc<sup>1</sup>, Erin Erskine, BSc<sup>1,2</sup>, Keerit Tauh,  
5   MD<sup>1</sup>, Kitty So, BSc<sup>1</sup>, Femke Streijger, PhD<sup>1</sup>, Katelyn Shortt, BSc<sup>1</sup>, Kyoung-Tae Kim, PhD<sup>1,3</sup>,  
6   Brian K. Kwon, MD, PhD, FRCSC<sup>1,4</sup>, Christopher R. West, PhD\*<sup>1,2</sup>.

7  
8   **Affiliations:**

9   <sup>1</sup> International Collaboration on Repair Discoveries (ICORD), University of British Columbia,  
10   Vancouver, Canada

11   <sup>2</sup> Department of Cellular and Physiological Sciences, Faculty of Medicine, University of British  
12   Columbia, Vancouver, Canada

13   <sup>3</sup> Department of Neurosurgery, School of Medicine, Kyungpook National University, Kyungpook  
14   National University Hospital, Daegu, South Korea

15   <sup>4</sup> Vancouver Spine Surgery Institute, Dept. of Orthopaedics, Faculty of Medicine, University of  
16   British Columbia, Vancouver, Canada

17  
18   **\*Correspondence:** Christopher West

19   Reichwald Health Sciences Centre, 1088 Discovery Avenue, Kelowna, BC, Canada, V1V1V7

20   Tel: 250-807-8891, Email: [chris.west@ubc.ca](mailto:chris.west@ubc.ca)

21 **Abstract**

22 Chronic high-thoracic and cervical spinal cord injury (SCI) results in a complex phenotype of  
23 cardiovascular consequences, including impaired left-ventricular contractility. Here, we sought to  
24 determine whether such dysfunction manifests immediately post-injury, and if so, whether  
25 correcting impaired contractility can improve spinal cord oxygenation (SCO<sub>2</sub>), blood flow (SCBF)  
26 and metabolism. Using a porcine model of SCI, we demonstrate that high-thoracic SCI acutely  
27 impairs cardiac contractility and causes substantial reductions in intraparenchymal SCO<sub>2</sub> and  
28 SCBF within the first hours post-injury. Utilizing the same model, we next show that treating the  
29 reduced contractile function with the  $\beta$ -agonist dobutamine is more efficacious at increasing SCO<sub>2</sub>  
30 and SCBF than the current clinical standard of vasopressor therapy, whilst also mitigating  
31 increased anaerobic metabolism and hemorrhage in the injured cord. Our data provide compelling  
32 evidence that cardio-centric hemodynamic management represents a novel and advantageous  
33 alternative to the current clinical standard of vasopressor therapy for acute traumatic SCI.

## 34 **Introduction**

35           The acute phase following a traumatic spinal cord injury (SCI) represents an important  
36 therapeutic window of opportunity to intervene with neuroprotective approaches that might limit  
37 secondary damage to the injured cord<sup>1</sup>, thereby providing the patient with the best chance of  
38 attaining some neurological recovery. Hemodynamic management is one of the only  
39 neuroprotective strategies available to clinicians, and current guidelines suggest that mean arterial  
40 pressure (MAP) be maintained between 85-90 mmHg with intravenous fluids and vasopressors  
41 such as norepinephrine (NE), with the aim of offsetting systemic hypotension and maintaining  
42 adequate spinal cord perfusion<sup>2</sup>. Though this “one-size-fits-all” strategy can improve spinal cord  
43 blood flow (SCBF), vasopressor management with NE has been shown to produce potentially  
44 harmful SCBF profiles in some acute SCI patients<sup>3</sup> and has been shown by multiple investigators  
45 to exacerbate intraparenchymal hemorrhage<sup>4-6</sup>. In the setting of acute SCI, clinical studies have  
46 shown strong associations between increased cord hemorrhaging and worsened neurological  
47 outcomes (i.e. more neurologically complete injuries)<sup>7</sup>. Such hemorrhaging is therefore a critically  
48 concerning side-effect in the application of vasopressor therapy as a first-line hemodynamic  
49 management strategy for patients with acute SCI. To date, the clinical literature and therapeutic  
50 approaches have not considered that cardiac contractile dysfunction may occur acutely post-SCI  
51 and contribute to reduced spinal cord oxygenation (SCO<sub>2</sub>) and SCBF. As such, a hemodynamic  
52 management strategy that focuses on the heart has not been forthcoming. Only a single published  
53 study has considered the use of inotropic agents such as dobutamine (DOB) for hemodynamic  
54 management of acute SCI<sup>8</sup>, however the efficacy of cardiac inotropes in improving cardiovascular  
55 and spinal cord hemodynamics has not been directly compared with that of vasopressor-based  
56 management strategies that focus solely on MAP.

57           Accordingly, the aims of the current research were twofold. In experiment 1, we sought to  
58   define the acute impact of high-level SCI on left ventricular (LV) contractility (i.e. end-systolic  
59   elastance;  $E_{es}$ ) using our porcine model of contusion SCI at the second thoracic spinal cord level  
60   (T2)<sup>9</sup>. In experiment 2, we conducted a randomized intervention trial in the same porcine model  
61   to compare the efficacy of using the cardiac-specific  $\beta$ -agonist DOB versus NE (i.e., current  
62   clinical standard) in augmenting  $SCO_2$  and SCBF acutely following T2 SCI. To address these aims,  
63   a total of 22 female Yucatan minipigs were instrumented with a LV pressure-volume admittance  
64   catheter and pulmonary artery catheter (Fig. 1a), as well as intraparenchymal probes for  $SCO_2$ ,  
65   SCBF and microdialysis placed 1.2 cm and 3.2 cm caudal to the site of injury. Animals received a  
66   T2 contusion injury (50 g weight drop, 20 cm height) with 2 hours compression (150 g total), and  
67   hemodynamic management with DOB or NE began 30 mins post-SCI up until 4 hours post-SCI  
68   (experimental endpoint). Here, we demonstrate first that LV load-independent contractile function,  
69   including  $E_{es}$ , is impaired within the first hour following a T2 SCI, and thereafter find that treating  
70   reduced contractile function with DOB is more efficacious than NE with respect to optimizing  
71   hemodynamics, improving the spinal cord microenvironment and reducing intraparenchymal  
72   hemorrhage.

73

## 74   **Results**

### 75   **Cardiac contractility is impaired in acute T2 SCI**

76           In experiment 1 ( $n=8$ ), LV maximal systolic pressure ( $P_{max}$ ), MAP and total peripheral  
77   resistance (TPR) were reduced within 1 hour post-SCI, and remained depressed up to 4 hours post-  
78   SCI (Fig. 1b, Fig. 1c and Fig. 1d). At 4 hours post-injury there was a slight but significant increase  
79   to LV filling volume (i.e. EDV; Fig. 1e); however, there were no significant alterations to LV

80 stroke volume (SV, Fig. 1f), ejection fraction (EF, Fig. 1g) or cardiac output measured with  
81 thermodilution ( $Q_{TD}$ , Fig. 1h) within the 4 hours following T2 SCI.

82         The major finding from experiment 1 was that LV contractility was immediately impaired  
83 within the first hour post-SCI. Specifically, we observed that LV load-independent systolic  
84 function assessed as  $E_{es}$  (Fig. 2a and Fig. 2b), preload-recrutable stroke work (Fig. 2d) and  
85 maximal rates of pressure generation for a given filling volume (Fig. 2e) were all reduced by 1  
86 hour post-SCI and remained depressed until 4 hours post-SCI. We additionally examined LV  
87 contractile reserve utilizing a high-dose DOB challenge (i.e. 10  $\mu\text{g}/\text{kg}/\text{min}$  DOB) before and 4  
88 hours following T2 SCI, and found that contractile reserve was compromised post-SCI compared  
89 to baseline (Fig. 2c). In contrast to the clear impairments to LV systolic function, LV load-  
90 independent diastolic function as assessed with the end-diastolic pressure-volume relationship  
91 (EDPVR) was not altered acutely post-SCI (Fig. 2f). Measures of load-dependent diastolic  
92 function, including LV end-diastolic pressure ( $P_{ed}$ ) and the rates of diastolic pressure decay ( $-$   
93  $dp/dt_{min}$  and  $\tau$ ), were also unaltered from baseline in the 4 hours following injury (Supplemental  
94 Table S1a).

95

### 96 **High-dose DOB optimizes LV function and hemodynamics**

97         In experiment 2, we utilized a randomized and counterbalanced design whereby 14  
98 additional animals ( $n=7$  per group) received individualized hemodynamic management with either  
99 DOB or NE starting 30 minutes post-SCI (Fig. 3a). Drug levels were continually titrated to achieve  
100 a target  $E_{es}$  of  $\sim 2.5\text{-}2.9\text{mmHg}/\text{ml}$  for animals receiving DOB, based on the baseline pre-SCI mean  
101  $E_{es}$  from animals in experiment 1, and a target MAP of  $\sim 85\text{-}90\text{mmHg}$  for animal receiving NE, in  
102 line with the current clinical guidelines<sup>2</sup>. As a result of this individualized approach, 4 of the

103 animals receiving DOB were administered higher doses (i.e.,  $\geq 2.5$   $\mu\text{g}/\text{kg}/\text{min}$ , DOB+) while 3  
104 received negligible doses (i.e.,  $\leq 0.5$   $\mu\text{g}/\text{kg}/\text{min}$ , DOB-; Fig 3a). As such, we subsequently stratified  
105 the DOB animals by dose (i.e. DOB+ and DOB- groups). All NE animals received sufficient doses  
106 to maintain MAP at 85-90mmHg (mean 0.16 $\mu\text{g}/\text{kg}/\text{min}$ , range 0.06-0.46 $\mu\text{g}/\text{kg}/\text{min}$ ), which were  
107 similar to those reported in our group's previous studies using a low-thoracic SCI porcine model<sup>10</sup>.

108 Hemodynamic management with DOB+ and NE both augmented MAP and LV  
109 contractility ( $E_{es}$ ) up to 4 hours post-SCI (Fig. 3b and Fig. 3c); however, the two drugs achieved  
110 increases to MAP via markedly different alterations to cardiac and vascular hemodynamics.  
111 Specifically, DOB+ increased MAP via improvements in LV systolic function (Fig. 3d and Fig.  
112 3h) and cardiac output (Fig 3e), whereas NE restricted stroke volume and cardiac output (Fig. 3d  
113 and Fig. 3e) by significantly augmenting LV afterload ( $E_a$ , Fig. 3g). DOB+ additionally enhanced  
114 LV early diastolic relaxation ( $\tau$ , Supplemental Table S2b), which was not observed with NE  
115 despite both groups having similar heart rates throughout the experiments (Fig. 3f). DOB- animals  
116 demonstrated small but significant improvements in LV contractility ( $E_{es}$ ), stroke work, stroke  
117 volume and MAP, however due to the very small doses of DOB received by DOB- animals those  
118 hemodynamic effects were minimal in comparison to DOB+.

119

## 120 **High-dose DOB improves spinal cord oxygenation and mitigates cord hemorrhaging**

121 Within the spinal cord parenchyma, DOB+ animals exhibited large improvements to  $\text{SCO}_2$   
122 (measured at the 1.2 cm probe) following decompression (Fig. 4b and Fig. 4c), and the relative  
123 increase to  $\text{SCO}_2$  was greatest in DOB+ compared to both CON and NE animals at 3 hours ( $p=0.05$   
124 vs. NE;  $p=0.02$  vs. CON) and 4 hours post-SCI ( $p=0.02$  vs. NE and CON). During the compression

125 period (i.e., initial 2 hours post-SCI), only DOB+ appeared to improve SCBF ( $p=0.028$  vs. CON  
126 at 2 hours post-SCI; Fig. 4d), while SCBF remained depressed in all other animals. DOB+  
127 additionally mitigated increases in the lactate-to-pyruvate ratio during the compression period  
128 (Fig. 4f) that were otherwise observed in the NE and CON animals.

129 Histological analyses at the injury epicenter demonstrated that NE exacerbated spinal cord  
130 hemorrhaging compared to CON (Fig. 4i and Fig. 4j), whereas animals receiving DOB+ were  
131 spared the increased hemorrhaging. Immunohistochemical analyses of the injury epicentre did not  
132 reveal any between-group differences in the densities of glial fibrillary acidic protein (GFAP+) or  
133 inflammatory activation (IBA1+, Fig. 5).

134

## 135 **Discussion**

136 Our findings provide compelling evidence that LV load-independent contractility is  
137 immediately impaired in acute high-level SCI, and that correcting LV contractility with DOB+ is  
138 beneficial to the spinal cord parenchyma by optimizing cord oxygenation and blood flow via  
139 cardio-genic improvements in MAP absent of systemic vasoconstriction. Furthermore, our data  
140 highlight that the current clinical standard of hemodynamic management with NE does not support  
141 improved LV function, does not modify SCBF and in fact appears to worsen hemorrhaging. This  
142 research therefore supports the efficacy of implementing a cardiac-focused hemodynamic  
143 management strategy in the acute phase following high-thoracic SCI.

144 In experiment 1, the immediate reductions to key load-independent measures of LV  
145 systolic function incontrovertibly indicates that intrinsic contractile dysfunction in high-level SCI  
146 results from the immediate loss of descending sympathetic input following high-level injury.  
147 Previously, only a small collection of echocardiographic studies in humans had provided some

148 evidence for chronically-altered LV systolic function in humans<sup>11</sup>, and the interpretation of those  
149 findings were limited due to the load-dependent nature of echo-derived data. To assess load-  
150 independent LV function our group has utilized LV pressure-volume catheterization in a chronic  
151 rodent model of SCI and reported reductions to LV  $E_{es}$  after a T2 injury<sup>12,13</sup>. Our present data  
152 extend these observations from the chronic setting by demonstrating that LV contractility is  
153 impaired immediately following high-level SCI. Importantly, we highlight that EF was unchanged  
154 despite clear reductions to LV contractility, reinforcing that EF does not adequately detect systolic  
155 or contractile dysfunction in SCI<sup>11</sup>. We have additionally identified a reduction to LV contractile  
156 reserve acutely after the injury, which may be attributable to a rapid loss of ‘baseline’ contractility  
157 and tonic neuro-hormonal activation of the myocardium that occurs following high-level SCI.  
158 Though our group has previously reported that systolic reserve is relatively intact in chronically-  
159 injured rats with T2 SCI<sup>13,14</sup>, those observations may reflect chronic hyper-responsiveness of  
160 cardiac  $\beta$ -adrenergic receptors<sup>15,16</sup>, which would not have occurred in the acute setting of the  
161 current study.

162         The impacts of acute high-level SCI on LV diastolic function are less clear, given there  
163 were no significant alterations to diastolic indices within the 4 hours following T2 SCI. The lack  
164 of changes to the EDPVR (load-independent measure of LV compliance or stiffness) and load-  
165 dependent diastolic pressure decay is presumably a function of time, given that long-term  
166 structural remodelling and tissue stiffening generally precede diastolic dysfunction<sup>17</sup>. While there  
167 was a small increase to EDV by 4 hours post-SCI, this may be explained by re-lengthening of the  
168 cardiomyocytes following the loss of tonic sympathetically-mediated  $\beta$ -adrenergic activation<sup>18</sup>.  
169 The impacts of SCI on the diastolic phase are not well-characterized amongst the literature, though  
170 some pre-clinical work from our group has identified blunted relaxation rates<sup>12</sup> alongside



171 significant myocardial fibrosis in rodents with chronic high-level SCI<sup>19</sup>, underscoring the time-  
172 dependency of altered diastolic function. Nonetheless our current data provide new evidence that  
173 diastolic function is not critically impacted within the first hours following high-level SCI.

174 In experiment 2, we demonstrate that correcting LV contractility with higher doses of DOB  
175 (i.e. DOB+) optimized both cardiac and spinal cord outcomes acutely post-SCI more effectively  
176 than the current clinical standard of hemodynamic management with vasopressors (i.e. NE).  
177 Though both approaches effectively augmented MAP, this was achieved with DOB+ by increasing  
178 cardiac output, whereas NE predominantly increased vascular resistance and LV afterload ( $E_a$ )  
179 precluding any improvements to LV systolic output. This substantial arterial afterload is  
180 concerning as it may additionally stress or damage the myocardium if management is prolonged,  
181 and further exacerbate the long-term negative consequences of SCI on the heart<sup>11</sup>.

182 Within the spinal cord microenvironment, DOB+ appeared to alleviate spinal cord  
183 ischemia more effectively than NE by optimizing cord oxygenation, blood flow and metabolic  
184 indices. In contrast, NE did not modify SCBF and worsened hemorrhaging, mirroring observations  
185 from Soubeyrand et al. <sup>4</sup> in a feline model. Several studies have linked NE with central gray matter  
186 hemorrhaging in experimental models<sup>5,6</sup>, which is thought to result from unfavourable blood flow  
187 redistribution in the cord microenvironment<sup>3</sup>. Specifically, NE may reduce flow in the intact cord  
188 circulation via  $\alpha_2$ -mediated vasoconstriction<sup>20,21</sup> and subsequently worsen blood loss and  
189 hemorrhage through the damaged microvasculature. In contrast to NE, DOB does not directly alter  
190 vascular tone, and we contend it may facilitate improved shear-mediated vasodilation<sup>22</sup> of the cord  
191 vasculature via increases in cardiac output, rather than augmenting the driving pressure to the site  
192 of hemorrhage. Collectively, our data provide compelling evidence that DOB+ has a beneficial

193 effect on the spinal cord parenchyma via cardio-genic improvements in MAP absent of systemic  
194 vasoconstriction.

195         This research supports the efficacy of implementing a cardiac-focused hemodynamic  
196 management strategy in the acute phase following high-thoracic SCI. We have demonstrated that  
197 correcting the reduction in LV contractility with higher doses of DOB optimizes LV function,  
198 hemodynamics and local cord oxygenation more effectively than the current clinical standard of  
199 NE despite similar elevations to MAP. We therefore contend that the method by which MAP is  
200 elevated has a profound effect on the injury site microenvironment. By non-selectively binding  
201 both  $\beta$ -and  $\alpha$ -adrenergic receptors, NE produces systemic vasoconstriction to augment MAP but  
202 at the cost of large increases to cardiac afterload which oppose any potential improvements to  
203 cardiac output. We therefore conclude that a cardiac-specific strategy provides a more  
204 advantageous approach for optimizing hemodynamic management in acute SCI than standard  
205 vasopressor treatment. These findings merit clinical investigation, given that hemodynamic  
206 management is one of the few neuroprotective treatment options for acute SCI patients.

207

## 208 **Materials and Methods**

### 209 **Ethics, animals and handling**

210 All protocols and procedures were compliant with Canadian Council on Animal Care  
211 policies, and ethical approval was obtained from the University of British Columbia Animal Care  
212 Committee (A16-0311) and United States Department of Defence (IACUC #A16-0311).

213 22 female Yucatan minipigs aged 2-3 months (20-25 kg; S&S Farms, Ramona, CA, USA)  
214 were acquired and housed in the Centre for Comparative Medicine (University of British  
215 Columbia, South Campus) animal facility for 1-2 weeks prior to surgery. Animals were housed in  
216 pairs or small groups (4-6 animals) in indoor pens with sawdust bedding and with access to an  
217 adjoining outdoor pen. Animals received daily visits from a researcher to become habituated to  
218 humans, were provided enrichment (toys e.g. chains, balls), water ad libitum and feed equal to  
219 1.5% of body mass twice per day.

220

### 221 **Experimental overview**

222 **Experiments 1 and 2.** All animals were instrumented similarly for cardiovascular and  
223 spinal cord measurements, with bilateral pressure catheters in the femoral arteries, a pressure-  
224 volume (PV) admittance catheter placed in the left ventricle (LV), a Swan-Ganz thermodilution  
225 catheter placed in the pulmonary artery and a venous balloon occlusion catheter advanced to the  
226 inferior vena cava (IVC) via the right femoral vein. The PV and Swan-Ganz catheters were  
227 advanced under fluoroscopic guidance. Placement was confirmed via the emergence of a typical  
228 pressure-volume loop and typical pulmonary artery pressure waveforms. A laminectomy was then  
229 performed to expose the spinal cord from the C8-T4 level, and custom-designed sensors for spinal  
230 cord blood flow, oxygenation, pressure, and microdialysis were placed in the spinal cord

231 parenchyma at 1.2 cm and 3.2 cm caudal to the impactor centre<sup>23</sup>. Once drug levels and sensors  
232 had stabilized (approximately 2-3 hours after laminectomy), baseline data for cardiac function,  
233 hemodynamics and spinal cord indices were obtained over a 30-minute period. Following baseline  
234 data collection, animals received a T2 weight-drop (50 g) contusion injury with 2 hours of spinal  
235 cord compression (additional 100 g, 150 g total). Cardiac, hemodynamic and spinal cord indices  
236 were continuously recorded up to 4 hours post-SCI, at which point animals were euthanized and  
237 spinal cord tissue was immediately harvested.

238 **Experiment 1: Effect of SCI on contractile function and reserve (n=8).** Once a stable  
239 plane of anaesthesia was reached prior to SCI, and hourly post-SCI, contractile function was  
240 assessed with transient IVC occlusions for characterization of load-independent systolic function,  
241 including end-systolic elastance ( $E_{es}$ ), preload-recruitable stroke work (PRSW) and the maximal  
242 rate of pressure generation for a given end-diastolic volume ( $dp/dt_{max}$ -EDV). Contractile reserve  
243 was assessed using a constant-rate infusion of DOB (10  $\mu$ g/kg/min) via an infusate port in the  
244 Swan-Ganz catheter for 10 minutes. This dosage has been previously utilized to challenge LV  
245 load-dependent<sup>24</sup> and contractile function in pigs<sup>25</sup>. Within the final 2 minutes of DOB infusion,  
246 LV load-independent contractility was assessed with transient IVC occlusions for characterization  
247 of the  $E_{es}$ . A minimum of 30 minutes recovery ( $\geq 5$  half-lives of DOB<sup>26</sup>) was provided before  
248 ‘baseline’ measurements began pre-SCI, and before euthanasia and tissue collection at the end of  
249 the experiments.

250 **Experiment 2: Comparing post-SCI hemodynamic management strategies (n=7 per**  
251 **group).** For animals receiving hemodynamic management with NE or DOB, treatment type was  
252 randomized and counterbalanced between groups. Drugs were administered via an infusion port  
253 on the Swan Ganz catheter, beginning at 30 minutes post-SCI until 4 hours post-SCI. Infusions of

254 NE were titrated to attain a target MAP of 85-90 mmHg<sup>8</sup>, and DOB was titrated to attain an E<sub>es</sub>  
255 slope of ~2.5-2.9 mmHg/ml, based on the average pre-SCI E<sub>es</sub> slope observed in experiment 1.  
256 Drugs were titrated continually through the first 30 minutes of infusion to attain the given target,  
257 and hourly thereafter until 4 hours post-SCI.

258

## 259 **Specific Methodology**

260 **Surgical preparation and anaesthesia.** Animals were fasted for 12 hours prior to surgery,  
261 pre-anaesthetized with intramuscular injections of telazol (4-6 mg/kg), xylazine (1 mg/kg) and  
262 atropine (0.02-0.04 mg/kg), and thereafter induced with propofol (2 mg/kg). Animals received  
263 endotracheal intubation for mechanical ventilation (10-12 breaths/min; tidal volume 12-15 ml/kg;  
264 Veterinary Anesthesia Ventilator model 2002, Hallowell EMC, Pittsfield, MA). A urinary catheter  
265 (10 F, Jorgensen Laboratories Inc., Loveland, CO) was placed for intra-operative bladder drainage,  
266 and intravenous catheters placed for administration of anesthetic agents and fluids. A rectal  
267 temperature probe was additionally placed, and core body temperature maintained at 38.5-39.5 °C  
268 with a heating pad (T/Pump, Gaymar Industries, Inc., Orchard Park, NY). Throughout surgery,  
269 animals received intravenous continuous rate infusions of propofol (9-13 mg/kg/hr), fentanyl (10-  
270 15 mg/kg/hr) and ketamine (5-8 mg/kg/hr), as well as intravenous fluid to maintain hydration (7-  
271 10 ml/kg/hr, 2.5% dextrose + 0.9% NaCl). The surgical plane of anesthesia was determined by the  
272 absence of jaw tone assessed by the veterinarian technicians. Standard monitoring was performed  
273 for heart rate (electrocardiogram) respiratory rate, end tidal carbon dioxide, MAP, and oxygen  
274 saturation (pulse oximeter 8600V, Nonin Medical Inc., Markham, ON).

275 **Cardiac and arterial catheterization.** After induction, animals were transferred to an  
276 operating table and oriented in a supine position. Five-centimeter incisions were made on the

277 medial side of both hindlimbs, and tissue bluntly dissected to reveal the femoral arteries. Two-inch  
278 intravenous catheters (20 g) were advanced into the arteries and connected to fluid-filled lines.  
279 Amplifiers and pressure transducers connected the arterial lines to an A/D board (PowerLab,  
280 ADInstruments, Colorado Springs, MO) for real-time monitoring for blood pressure (i.e., systolic  
281 blood pressure [SBP], diastolic blood pressure [DBP] and MAP) with commercially-available  
282 software (LabChart PRO v8.1.9, ADInstruments). Two catheters were utilized in case one of the  
283 lines failed while repositioning the animal to the prone position.

284 For placement of cardiac catheters, a 5 cm incision was made in the tissue overlaying the  
285 right jugular vein, and blunt dissection revealed the carotid artery and external jugular vein. Prior  
286 to insertion, channels for the admittance PV catheter (5F; Scisence Catheter and ADVantage PV  
287 System [ADV500], Transonic Systems Inc.) and Swan-Ganz thermodilution catheter (7.5 F;  
288 Edwards Lifesciences Canada Inc., Mississauga, ON) were connected to the A/D board for real-  
289 time visualization of catheter pressures. The pigtailed PV catheter was inserted with an introducer  
290 (12 F; Fast-Cath Hemostasis Introducer, Abbott) into the carotid artery and advanced until an  
291 arterial waveform was visualized, and the Swan-Ganz catheter inserted into the external jugular  
292 vein and advanced until a right ventricular pressure waveform became apparent. Both catheters  
293 were then further advanced under combined pressure and fluoroscopic guidance (Arcadis Avantic,  
294 Siemens Healthcare Limited, Oakville, ON) to ultimately place the PV catheter into the LV and  
295 the Swan-Ganz catheter into the pulmonary artery. Sutures were placed around the vessels and  
296 catheters to secure placement and the tissue was closed.

297 **Laminectomy.** Following placement of arterial and cardiac catheters, animals were  
298 reoriented to the prone position, and the spinous processes, laminae and transverse processes of  
299 the C8-T7 spine were exposed with electrocautery. Using anatomical landmarks, two 3.5×24 mm

300 multi-axial screws (Select™ Multi Axial Screw, Medtronic, Minneapolis, MN) were placed into  
301 the T1 and T4 pedicles. A 3.2 mm diameter titanium rod (Medtronic, Minneapolis, MN) was  
302 affixed to the screws to rigidly fix the T1-T2-T3 segments and additionally secure the weight drop  
303 system. A T2-T3 laminectomy was performed to provide a circular window  $\geq 1.2$  cm in diameter  
304 exposing the dura mater and spinal cord, then the C8-T4 laminae were further resected to expose  
305 the spinal cord and allow for insertion of sensors and catheters surrounding the injury site.

306 **Implantation of spinal cord blood flow, oxygenation, pressure and microdialysis**  
307 **probes.** Probes for intraparenchymal spinal cord monitoring and microdialysis were placed as  
308 previously described<sup>10</sup>. Briefly, a custom-made sensor platform was secured over the titanium rods  
309 and adjusting the pedicle screws. Six custom introducers were inserted through the platform at 45°  
310 angles, entering the dura at 1.2 cm and 3.2 cm caudal to the injury epicenter. Sensors for blood  
311 flow and oxygenation (combined), pressure and microdialysis were guided through the introducers  
312 into the ventral aspect of the white mater, with final placement of the catheter tip centers ~2 mm  
313 (proximal probes) and 22 mm (distal probes) from the edge of the impactor. Placement in the spinal  
314 cord was confirmed with a commercially-available ultrasound system (LOGIQ e Vet, GE  
315 Healthcare, Fairfield, CT) using a linear array 4-10 MHz transducer (8L-RS). Cyanoacrylate glue  
316 was applied to the dural surface surrounding catheter implantation to prevent cerebrospinal fluid  
317 leakage. A minimum of 2 hours was provided for intraparenchymal probe stabilization prior to the  
318 collection of baseline data.

319 **Spinal cord injury.** A weight-drop impactor device with an articulating arm (660, Starrett,  
320 Athol, MA) and guide rail was mounted on a metal base and secured to the T1 and T4 vertebra  
321 with the pedicle screws described above. The tip of the impactor (0.953 cm diameter), equipped  
322 with a load cell (LLB215, Futek Advanced Sensor Technology, Irvine, CA) to acquire force of

323 impact data, was oriented vertically above the exposed dura and cord at the T2 level. The guide  
324 rail was equipped with a linear position sensor (Balluff Micropulse®, Balluff Canada Inc.,  
325 Mississauga, ON) to obtain data on impactor position during the weight drop. The device was  
326 remotely operated using LabVIEW software (National Instruments, Austin, TX), which  
327 additionally acquired real-time impactor force and position data. Five minutes prior to injury,  
328 animals received a continuous-rate infusion of fentanyl (7 µg/kg over 1 minute). The SCI was  
329 carried out by dropping a 50 g cylinder plastic weight through the guide rail from a height of  
330 approximately 16 cm, with another 100 g weight added immediately following the initial weight-  
331 drop for a total 150 g compression. At 2 hours post-SCI, the compression weight and spinal cord  
332 injury device were removed (decompression), after which pedicle screws were removed and bone  
333 wax was used to close screw holes in the vertebral body.

#### 334 **Measurement and analysis of load-dependent and load-independent LV function.**

335 During experiments, LV pressure and volume data were continuously obtained from the PV  
336 catheter, as outlined above, and all analyses of LV-PV data were performed off-line using  
337 LabChart PRO software (v8.1.9, ADInstruments, Colorado Springs, CO) with the PV Loop  
338 Analysis module. Load-dependent measures of LV pressure indices (maximal pressure [ $P_{\max}$ ],  
339 minimum pressure [ $P_{\min}$ ], end-systolic pressure [ $P_{\text{es}}$ ], end-diastolic pressure [ $P_{\text{ed}}$ ], maximum rate  
340 of pressure generation [ $d_p/d_{\text{tmax}}$ ], maximal rate of pressure decay [ $d_p/d_{\text{tmin}}$ ], time constant of  
341 diastolic pressure decay [ $\tau$ ]), volumetric indices (end-diastolic volume [EDV], end-systolic  
342 volume [ESV], stroke volume [SV], ejection fraction [EF]), and stroke work and arterial elastance  
343 ( $E_a$ ) were assessed from basal loops over a 1-minute period immediately preceding the defined  
344 measurement point (i.e. prior to IVC occlusions and thermodilution).



345 For the assessment of load-independent LV function, LV preload was manipulated using  
346 transient IVC occlusions at baseline (pre-SCI), 30 minutes post-SCI (just prior to hemodynamic  
347 management in experiment 2) and then hourly up to 4 hours post-SCI. In experiment 1, IVC  
348 occlusions were also performed during the DOB challenge. Analysis of approximately 10-15 PV  
349 loops during IVC occlusions allowed for assessments of load-independent systolic and diastolic  
350 function, including  $E_{es}$  and the end-diastolic pressure-volume relationship (EDPVR), respectively.

351 **Measurement of pulmonary pressures and cardiac output via Swan-Ganz**  
352 **catheterization.** During experiments, pulmonary artery pressures were monitored in real-time and  
353 continually recorded from the Swan-Ganz catheter. Cardiac output (Q) was measured with the  
354 thermodilution technique at baseline (pre-SCI), 30 minutes (prior to hemodynamic management)  
355 and then hourly post-SCI. Briefly, bolus infusions (~10 ml) of iced saline (0-6 °C) were  
356 administered through a temperature-recording flow-through housing (REF: 93505, Edwards  
357 Lifesciences Canada Inc., Mississauga, ON) and into the proximal port of the Swan-Ganz catheter.  
358 Bolus infusions for thermodilution were always performed  $\geq 1$  minute following IVC occlusions.  
359 Calculations of Q were performed off-line using LabChart PRO software (v8.1.9, ADInstruments,  
360 Colorado Springs, CO) with the Cardiac Output Analysis module (v1.3).

361 **Measurement of spinal cord oxygenation, blood flow and pressure, and metabolism.**  
362 Measurements of spinal cord oxygenation and blood flow were obtained in real-time using a multi-  
363 parameter probe (NX-BF/OF/E, Oxford Optronix, Oxford, UK) attached to a combined  
364 OxyLab/OxyFlo channel monitor, as previously described<sup>10</sup>. Spinal cord partial pressure of oxygen  
365 ( $SCO_2$ ) was monitored with fiber optic oxygen sensors that utilize the fluorescence quenching  
366 technique<sup>27</sup>. Relative changes in SCBF were monitored with laser-Doppler flowmetry. Spinal cord  
367 pressure was assessed with custom-manufactured fiber optic pressure transducers (FOP-LS-NS-

368 1006A, FISO Technologies Inc., Harvard Apparatus, Quebec, Canada) that employ Fabry-Pérot  
369 interferometry<sup>10,28</sup>. Pressure transducers were connected to a signal conditioner module (EVO-SD-  
370 5/FPI-LS-10, FISO Technologies Inc., Harvard Apparatus, Quebec, Canada) and data were  
371 continually recorded using the Evolution software (FISO Technologies Inc., Harvard Apparatus,  
372 Quebec, Canada).

373 Energy-related metabolites were measured with microdialysis probes (CMA11, CMA  
374 Microdialysis, Harvard Apparatus, Quebec, Canada) as outlined previously<sup>10</sup>. Briefly, a  
375 subcutaneous implantable micropump (SMP-200, IPrecio, Alzet Osmotic Pumps, Durect  
376 Corporation, Cupertino, CA) was used to continuously perfuse probes with artificial cerebrospinal  
377 fluid (Perfusion Fluid CNS, CMA Microdialysis, Harvard Apparatus, Quebec, Canada) and  
378 dialysates were acquired and frozen with dry ice every 15 minutes, starting at baseline (pre-SCI)  
379 until 4 hours post-SCI. Samples were analyzed for five metabolites (i.e., lactate, pyruvate, glucose,  
380 glutamate, and glycerol) within one week of collection (ISCUSflex Microdialysis Analyzer, M  
381 Dialysis, Stockholm, Sweden).

382 Measures of  $SCO_2$ , SCBF, spinal cord pressure and microdialysis were acquired from both  
383 locations (i.e., 1.2 cm and 3.2 cm caudal to the impactor) throughout experiments 1 and 2.

384 **Spinal cord tissue processing, histology and immunochemistry.** Following euthanasia,  
385 6 cm of spinal tissue surrounding the injury epicenter was removed and placed in 4%  
386 paraformaldehyde. Over the next 15 days, tissue was placed in increasing concentrations of sucrose  
387 until a concentration of 30% was reached. The tissue was then cut into 1 cm sections (ensuring the  
388 injury epicenter is within a single section), then embedded in optimal cutting temperature matrix  
389 (Shandon Cryomatrix, Thermo Scientific), frozen, and kept at  $-80^\circ$  C. The injury section was  
390 further cut into  $30\ \mu\text{m}$  sections and mounted onto a series of 10 slides coated with Silane Surgipath

391 Solution (Leica). These slides were then stored at  $-80^{\circ}$  C. For histology and immunocytochemistry,  
392 sections were thawed at room temperature for 1 hour, at which time a hydrophobic barrier was  
393 drawn using ImmEDGE Hydrophobic Barrier Pen (Vector Laboratories). Sections were then  
394 rehydrated in 0.1 M PBS for 10 minutes then incubated with 10% normal donkey serum 0.2%  
395 Triton X-100 plus 0.1% sodium azide in PBS. Sections were incubated overnight with primary  
396 antibody rabbit anti-IBA1 (1:1000, Novus NBP2-19019). Sections were incubated for 2 hours with  
397 secondary antibody Alexa Fluor 488 donkey anti-rabbit (1:1000 abcam ab150073), and glial  
398 fibrillary acidic protein (GFAP) conjugated Cy3 produced in mouse (Sigma, C9205). Slides were  
399 cover-slipped with ProLong Gold with DAPI (Invitrogen). For hematoxylin and eosin (H&E,  
400 Leica Biosystems, San Diego, CA, USA) staining, slides were thawed at room temperature and  
401 staining was conducted using standard techniques laid out by Leica. Slides were cover-slipped  
402 with ProLong Gold (Invitrogen).

403 **Analyses of immunocytochemistry and histology data.** Immunohistochemical staining was  
404 imaged using a Zeiss Axiophot microscope (Carl Zeiss, Oberkochen, Germany) equipped with a  
405 digital camera (Olympus Q5). H&E stains were imaged using a Leica Aperio CS2 scanner (Leica  
406 Biosystems, San Diego, CA, USA). All images were processed and analyzed by standard  
407 densitometric analyses using ImageJ (U. S. National Institutes of Health, Bethesda, Maryland,  
408 USA). Briefly, quantification of the immunostaining, GFAP and IBA1, were carried out by  
409 measuring the immunopositive areas in the spinal cord section. Similarly, quantification of the  
410 H&E staining was carried out by manually outlining the area of the regions of hemorrhaging,  
411 which were identified by areas that exhibited dense red staining. All positive stains are expressed  
412 as a % of total spinal cord area. Reported values reflect means of 5 separate sections per animal.

413

## 414 **Statistical analysis and sample size calculation**

415 Data are presented as means  $\pm$  standard deviation (SD) in figures and supplemental tables  
416 (for non-normally distributed data, medians and interquartile ranges are provided in Supplemental  
417 Table 3). Normalcy was determined using the Shapiro-Wilk test. For experiment 1, normally  
418 distributed dependent variables were analyzed using a one-way repeated-measures analysis of  
419 variance (ANOVA). Post hoc pairwise comparisons were made with Fisher's LSD for planned  
420 within-group comparisons, and Tukey's HSD for between-group comparisons. Paired t-tests were  
421 used to compare data between DOB challenges pre- and post-SCI. For experiment 2, normally-  
422 distributed dependent variables were analyzed with a repeated measures ANOVA with two  
423 independent factors (group  $\times$  time), and when a significant effect was detected post hoc  
424 comparisons were performed for within-group data with Fisher's LSD, and for between-group data  
425 with Tukey's test. For non-normally distributed data, a Friedman repeated-measures ANOVA on  
426 ranks was used to detect within-group differences over time, and within-group pairwise  
427 comparisons performed with Wilcoxon matched pairs test. For between-group comparisons, a  
428 Kruskal-Wallis ANOVA was used with Mann-Whitney U tests for pairwise comparisons. All  
429 statistical analyses were performed using Statistica (v13, TIBCO Software Inc., Palo Alto, CA)  
430 alpha set *a priori* to 0.05.

431 Prior to this study, there were no published data on LV  $E_{es}$  in a porcine model of spinal  
432 cord injury. However, in our group's rodent studies of T2 SCI, we have reported a significant mean  
433 difference in  $E_{es}$  of 0.67 mmHg/ $\mu$ l with a pooled SD of 0.17 mmHg/ $\mu$ l between animals with T2  
434 SCI and sham injury (i.e., control)<sup>13</sup>. For experiment 1, assuming a power of 0.95 and  $\alpha$  of 0.05  
435 we required a minimum of six animals per group to detect significant changes in  $E_{es}$  across four  
436 time-points (pre-SCI and every hour up to 4 hours post-SCI). We chose to include a minimum of

437 seven animals per group to account for any discrepancies in placing the LV-PV catheter and spinal  
438 cord probes.

439 For experiment 2 examining the impacts of hemodynamic management, no published data  
440 in the porcine model of SCI had reported significant between-group differences in  $\text{SCO}_2$ . However,  
441 our group had reported a pooled SD of  $\text{SCO}_2$  (expressed as % of baseline) of 40% in animals  
442 receiving vasopressor-based hemodynamic management<sup>10</sup>. With seven animals per group, we were  
443 powered to detect a difference of 29% between groups utilizing and SD of 40%, an  $\alpha$  of 0.05 and  
444 power of 0.95.

445

#### 446 **Data availability**

447 The authors confirm that the data supporting the findings of this study are available within  
448 the paper and its Supplementary material

449

450 **Acknowledgments**

451 We thank Dr. Robert Boushel for providing his equipment and expertise for the thermodilution  
452 method in these experiments.

453

454 **Sources of Funding**

455 US Department of Defense (W81XWH017-1-0660), Craig Nielsen Foundation (459120), Michael  
456 Smith Foundation for Health Research (Trainee Award #17197)

457

458 **Author contributions**

459 C.R.W. contributed to the conception of the study and its design, interpretation of data, drafting  
460 and final editing of the manuscript. A.M.W. contributed to the study design, data acquisition,  
461 analyses and interpretation, drafting and revision of the manuscript. N.M. contributed to the study  
462 design, data acquisition and revision of the manuscript. E.E. contributed to data acquisition and  
463 analyses, and revision of the manuscript. K.T., K.S., F.S., K.Sh. and K-T.K. contributed to the data  
464 acquisition and revision of the manuscript. B.K.K. contributed to the conception of the study and  
465 its design, interpretation of data, drafting and final editing of the manuscript.

466

467 **Competing interests**

468 No conflicts of interest to report.

469

470 **Supplementary Materials**

471 Supplemental Tables S1a-b, Tables S2a-e and Table S3

472

473 **References**

- 474 1. Rowland, J. W., Hawryluk, G. W. J., Kwon, B. & Fehlings, M. G. Current status of acute  
475 spinal cord injury pathophysiology and emerging therapies: promise on the horizon.  
476 *Neurosurg Focus* **25**, E2 (2008).
- 477 2. Resnick, D. K. Updated Guidelines for the Management of Acute Cervical Spine and Spinal  
478 Cord Injury. *Neurosurgery* **72 Suppl 2**, 1 (2013).
- 479 3. Gallagher, M. J., Hogg, F. R. A., Zoumprouli, A., Papadopoulos, M. C. & Saadoun, S.  
480 Spinal Cord Blood Flow in Patients with Acute Spinal Cord Injuries. *Journal of*  
481 *Neurotrauma* **36**, 919–929 (2019).
- 482 4. Soubeyrand, M. *et al.* Effect of norepinephrine on spinal cord blood flow and parenchymal  
483 hemorrhage size in acute-phase experimental spinal cord injury. *Eur Spine J* **23**, 658–665  
484 (2014).
- 485 5. Rawe, S. E., Roth, R. H. & Collins, W. F. Norepinephrine Levels in Experimental Spinal-  
486 Cord Trauma. Part 2: Histopathological Study of Hemorrhagic Necrosis. *Journal of*  
487 *Neurosurgery* **46**, 350–357 (1977).
- 488 6. Osterholm, J. L. & Mathews, G. J. Altered norepinephrine metabolism following  
489 experimental spinal cord injury. 1. Relationship to hemorrhagic necrosis and post-wounding  
490 neurological deficits. *Journal of Neurosurgery* **36**, 386–394 (1972).
- 491 7. Miyanji, F., Furlan, J. C., Aarabi, B., Arnold, P. M. & Fehlings, M. G. Acute cervical  
492 traumatic spinal cord injury: MR imaging findings correlated with neurologic outcome--  
493 prospective study with 100 consecutive patients. *Radiology* **243**, 820–827 (2007).

- 494 8. Levi, L., Wolf, A. & Belzberg, H. Hemodynamic parameters in patients with acute cervical  
495 cord trauma: description, intervention, and prediction of outcome. *Neurosurgery* **33**, 1007–  
496 1017 (1993).
- 497 9. West, C. R. *et al.* A porcine model for studying the cardiovascular consequences of high-  
498 thoracic spinal cord injury. *J Physiol* **598**, 929–942 (2020).
- 499 10. Streijger, F. *et al.* A Direct Comparison between Norepinephrine and Phenylephrine for  
500 Augmenting Spinal Cord Perfusion in a Porcine Model of Spinal Cord Injury. *Journal of*  
501 *Neurotrauma* **35**, 1345–1357 (2018).
- 502 11. Williams, A. M., Gee, C. M., Voss, C. & West, C. R. Cardiac consequences of spinal cord  
503 injury: systematic review and meta-analysis. *Heart* **105**, 217–225 (2019).
- 504 12. Poormasjedi-Meibod, M.-S. *et al.* Experimental Spinal Cord Injury Causes Left-Ventricular  
505 Atrophy and Is Associated with an Upregulation of Proteolytic Pathways. *Journal of*  
506 *Neurotrauma* **36**, 950–961 (2019).
- 507 13. DeVeau, K. M. *et al.* A comparison of passive hindlimb cycling and active upper-limb  
508 exercise provides new insights into systolic dysfunction after spinal cord injury. *Am. J.*  
509 *Physiol. Heart Circ. Physiol.* **313**, H861–H870 (2017).
- 510 14. DeVeau, K. M. *et al.* Challenging cardiac function post-spinal cord injury with dobutamine.  
511 *Auton Neurosci* **209**, 19–24 (2018).
- 512 15. Senard, J. M. *et al.* Pharmacological evidence of alpha 1- and alpha 2-adrenergic  
513 supersensitivity in orthostatic hypotension due to spinal cord injury: a case report. *Eur J*  
514 *Clin Pharmacol* **41**, 593–596 (1991).
- 515 16. Convertino, V. A. Cardiovascular consequences of bed rest: Effect on maximal oxygen  
516 uptake. *Medicine & Science in Sports & Exercise* **29**, 191–196 (1997).



- 517 17. Lester, S. J. *et al.* Unlocking the Mysteries of Diastolic Function. *Journal of the American*  
518 *College of Cardiology* **51**, 679–689 (2008).
- 519 18. Kreipke, R. E. & Birren, S. J. Innervating sympathetic neurons regulate heart size and the  
520 timing of cardiomyocyte cell cycle withdrawal. *J Physiol* **593**, 5057–5073 (2015).
- 521 19. West, C. R. *et al.* Passive hind-limb cycling improves cardiac function and reduces  
522 cardiovascular disease risk in experimental spinal cord injury. *J Physiol* **592**, 1771–1783  
523 (2014).
- 524 20. Crawford, R. A., Gregory, P. C. & Griffiths, I. R. The response of feline spinal pial arterioles  
525 to norepinephrine. *Journal of Neurosurgery* **52**, 60–63 (1980).
- 526 21. Kobayashi, H., Cazzaniga, A., Spano, P. & Trabucchi, M. Ontogenesis of alpha- and beta-  
527 receptors located on cerebral microvessels. *Brain Research* **242**, 358–360 (1982).
- 528 22. Noris, M. *et al.* Nitric oxide synthesis by cultured endothelial cells is modulated by flow  
529 conditions. *Circ Res* **76**, 536–543 (1995).
- 530 23. Streijger, F. *et al.* Changes in Pressure, Hemodynamics, and Metabolism within the Spinal  
531 Cord during the First 7 Days after Injury Using a Porcine Model. *Journal of Neurotrauma*  
532 **34**, 3336–3350 (2017).
- 533 24. van Woerkens, L. J., van der Giessen, W. J. & Verdouw, P. D. Cardiovascular effects of  
534 dopamine and dobutamine in conscious pigs with chronic heart failure. *Crit. Care Med.* **21**,  
535 420–424 (1993).
- 536 25. Zhou, W. *et al.* Left ventricular twist and untwist rate provide reliable measures of  
537 ventricular function in myocardial ischemia and a wide range of hemodynamic states.  
538 *Physiological Reports* **1**, e00110 (2013).
- 539 26. Ruffolo, R. R. The Pharmacology of Dobutamine. *Am. J. Med. Sci.* **294**, 244–248 (1987).

- 540 27. Penjweini, R. *et al.* Intracellular oxygen mapping using a myoglobin-mCherry probe with  
541 fluorescence lifetime imaging. *J. Biomed. Opt.* **23**, 1–14 (2018).
- 542 28. Pinet, E. Fabry-Pérot Fiber-Optic Sensors for Physical Parameters Measurement in  
543 Challenging Conditions. *Journal of Sensors* **2009**, 1–9 (2009).
- 544

545 **Figures**

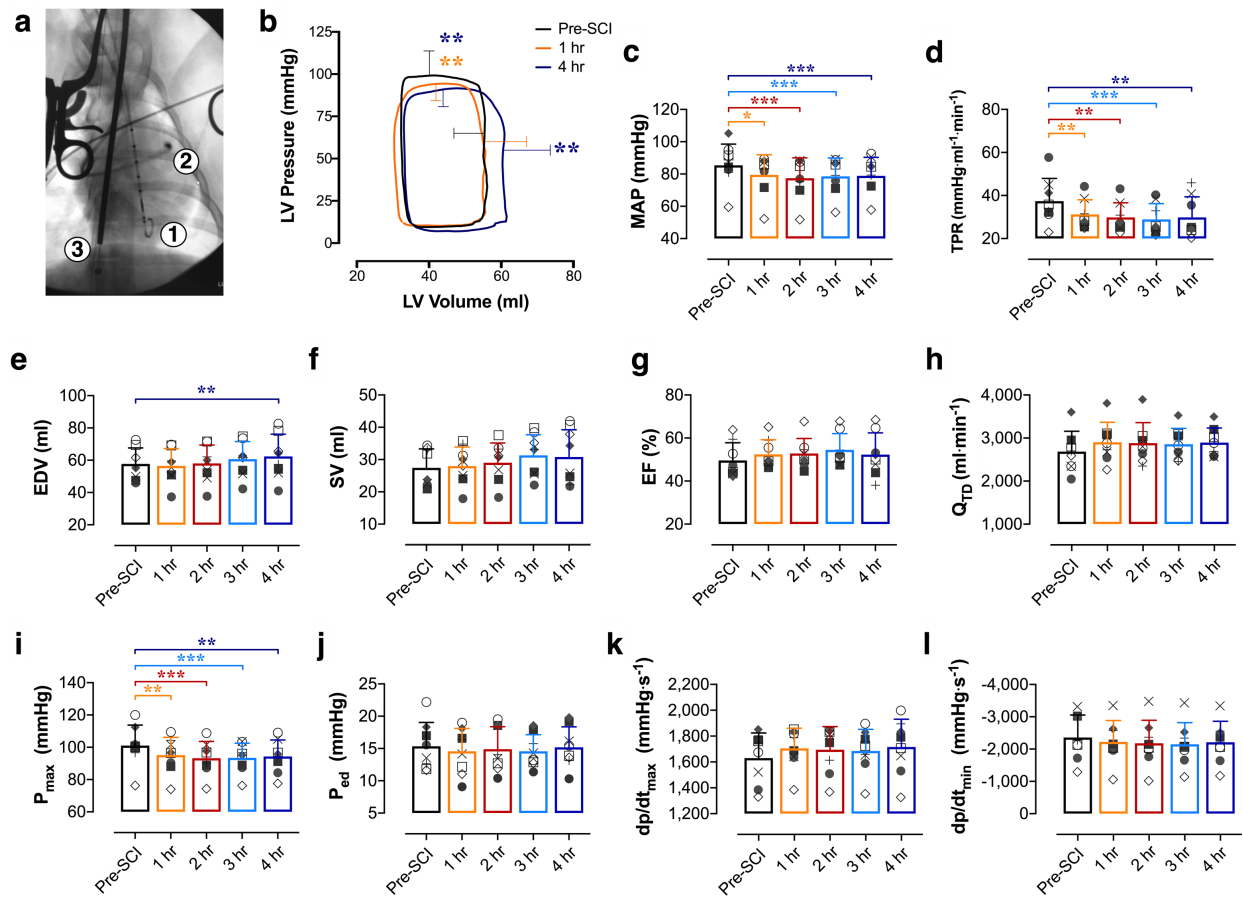

546

547 **Figure 1.** Altered load-dependent LV function and hemodynamics acutely following T2 SCI  
 548 ( $n=8$ ). (a) Cardiac instrumentation with a LV pressure-volume admittance catheter [1], Swan-  
 549 Ganz catheter [2] advanced to the pulmonary artery and a balloon-tip inferior vena cava (IVC)  
 550 occlusion catheter [3] for transient reductions to preload and assessments of LV end-systolic  
 551 elastance ( $E_{cs}$ ). (b) Basal pressure-volume loops represent mean interpolated data (SD bars shown  
 552 for peak systolic pressure,  $P_{max}$ , and end-diastolic volume, EDV) across the cardiac cycle at  
 553 baseline (pre-SCI, black), 1 hour (orange) and 4 hours (blue) post-SCI.  $P_{max}$  was reduced within  
 554 the first hour post-SCI and remained lowered up to 4 hours post-SCI. EDV was increased  
 555 compared to pre-SCI at 4 hours, though LV stroke volume (SV) was not significantly altered by  
 556 the experiment end-point. (c) Mean arterial pressure (MAP) and (d) total peripheral resistance

557 (TPR) were reduced within the first hour post-SCI, and those reductions were sustained up to 4  
558 hours post-SCI. (e) While EDV was augmented at 4 hours post-SCI, (f) SV, (g) ejection fraction  
559 (EF) and (h) cardiac output ( $Q_{td}$ ) were unchanged post-SCI. (i)  $P_{max}$  was impaired within 1 hour  
560 post-SCI, but (j) end-diastolic pressure ( $P_{ed}$ ), (k) the maximal rates of systolic pressure generation  
561 ( $dp/dt_{max}$ ) and (l) diastolic pressure decay ( $dp/dt_{min}$ ) were unchanged within 4 hours post-SCI.  
562 \* $p < 0.05$ , \*\* $p < 0.01$ , \*\*\* $p < 0.001$  versus pre-SCI. Data represent means  $\pm$  standard deviation (SD),  
563 and were assessed using a one-way repeated measures ANOVA with Fisher's LSD for post-hoc  
564 comparisons versus pre-SCI data.

565

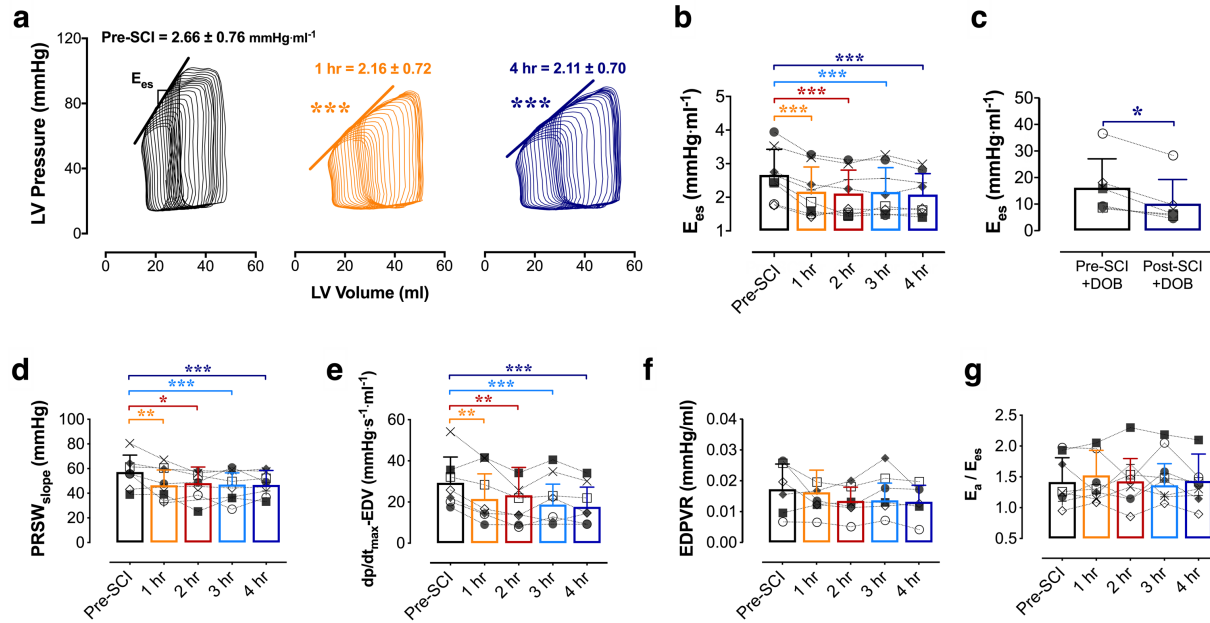

566

567 **Figure 2.** Impaired LV systolic load-independent function post-SCI. **(a)** Representative PV loops  
 568 during IVC occlusions illustrating impaired LV contractility (end-systolic elastance;  $E_{es}$ ) within 1  
 569 hour (middle, orange) and up to 4 hours (right, blue) post-SCI. **(b)** Group data showing the  
 570 reduction to  $E_{es}$  acutely post-SCI. **(c)** Animals additionally had reduced  $E_{es}$  responses to  
 571 dobutamine challenges ('DOB',  $10 \mu\text{g}/\text{kg}/\text{min}$ ) post-SCI. **(d)** Impaired systolic load-independent  
 572 function is further supported by the early (1 hour) and sustained reductions to preload-recruitable  
 573 stroke work (PRSW) and **(e)** the rate of maximal pressure generation for a given EDV ( $dp/dt_{\text{max}}\text{-}$   
 574 EDV). **(f)** The end-diastolic pressure volume relationship (EDPVR) was not altered acutely post-  
 575 SCI. **(g)** There were no changes to the relationship of arterial elastance ( $E_a$ ) to  $E_{es}$ , due to  
 576 simultaneous reductions in LV afterload and contractility following SCI. Statistics are identical to  
 577 those outlined in Figure 1.

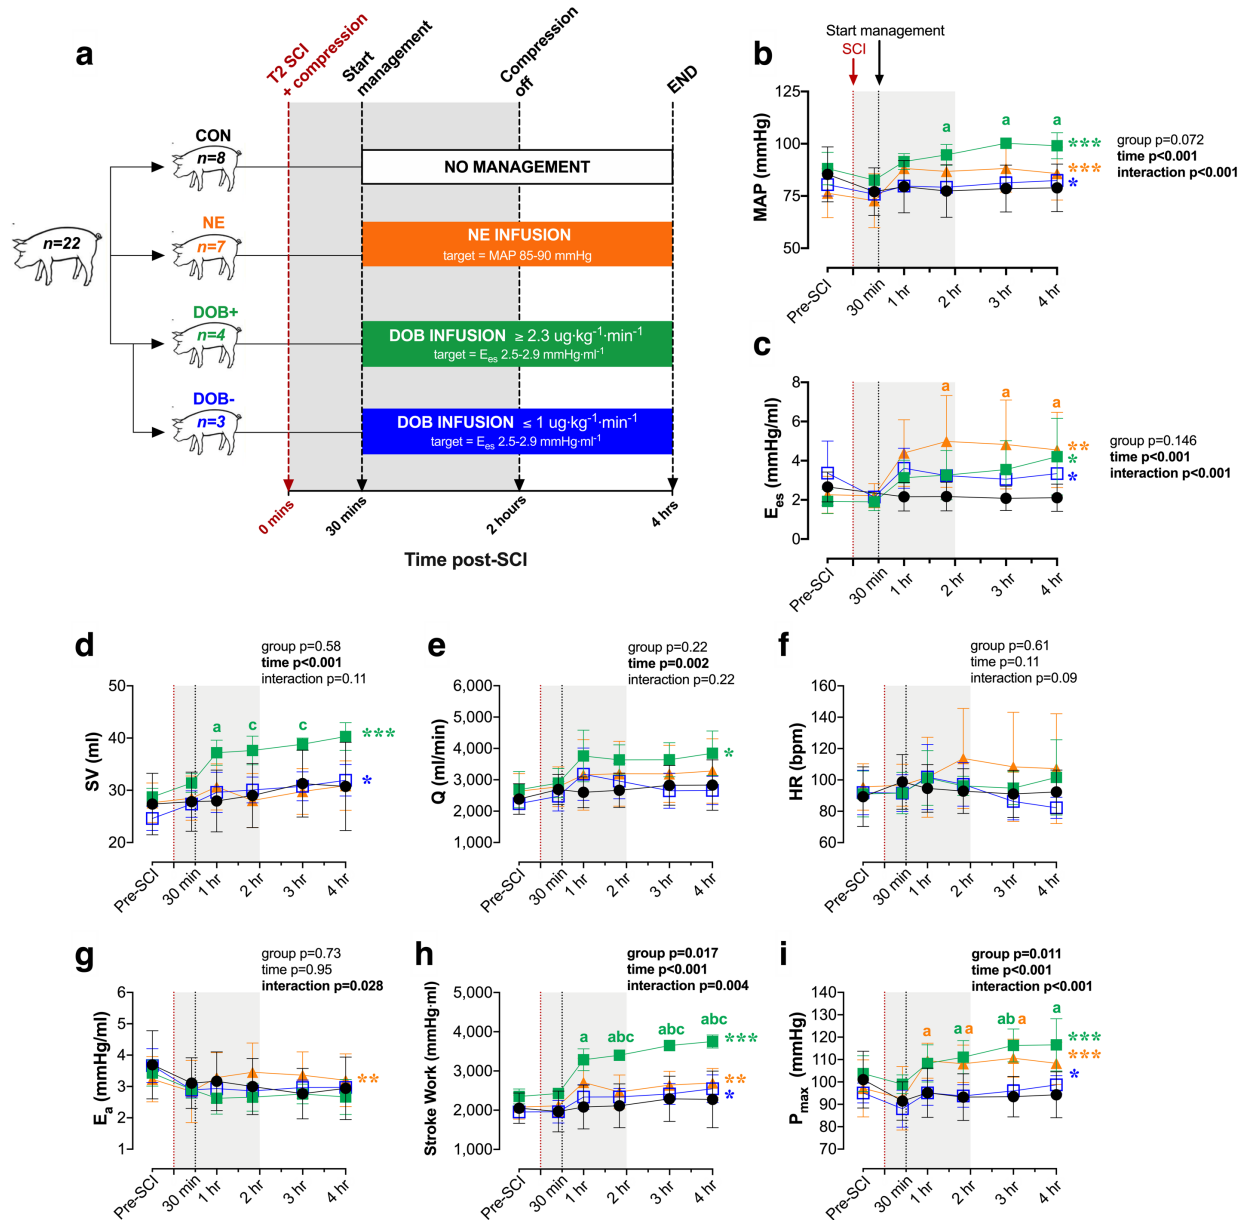

578

579 **Figure 3.** Impacts of hemodynamic management with dobutamine (DOB) and norepinephrine  
 580 (NE) on hemodynamics and LV function following acute T2 SCI. Dependent variables from 30  
 581 mins (i.e. start of hemodynamic management) to 4 hours post-SCI were analyzed using a two-way  
 582 repeated-measures ANOVA (factors: time, group), and post-hoc comparisons were made with  
 583 Tukey's test (between-group) and Fisher's LSD (within-group compared to 30 mins). (a)  
 584 Following experiment 1 (control animals, CON, black), an additional 14 animals received

585 hemodynamic management starting 30 mins post-SCI with either DOB titrated to a target  $E_{es}$  of  
586  $\sim 2.5$ - $2.9$  mmHg/ml, or NE (orange) titrated to a mean arterial pressure (MAP) of 85-90 mmHg.  
587 Three animals receiving DOB had a relatively high baseline  $E_{es}$ , and as a result received minimal  
588 doses of DOB (i.e.,  $\leq 0.5 \mu\text{g}/\text{kg}/\text{min}$ , DOB-, blue) while 4 animals received substantial DOB doses  
589 (i.e.,  $\geq 2.5 \mu\text{g}/\text{kg}/\text{min}$ , DOB+, green). **(b)** Both DOB+ and NE augmented MAP, however MAP was  
590 significantly augmented in DOB+ compared to CON animals. **(c)** LV contractility,  $E_{es}$ , was  
591 augmented by both DOB and NE. **(d)** Only DOB+ generated increases in LV stroke volume (SV)  
592 and **(e)** cardiac output (Q), which were not observed with NE. **(f)** There were no significant changes  
593 to heart rate (HR) with hemodynamic management, nor were there differences between the groups.  
594 **(g)** LV afterload increased with NE management but not with DOB. **(h)** Stroke work, an index of  
595 systolic function, is only increased with DOB+, **(i)** despite increases to  $P_{max}$  in both NE and DOB.  
596 \* $p < 0.05$ , \*\* $p < 0.01$ , \*\*\* $p < 0.001$  (within-group effect for time). <sup>a</sup> $p < 0.05$  vs CON; <sup>b</sup> $p < 0.05$  vs DOB  
597 -; <sup>c</sup> $p < 0.05$  vs NE.  
598

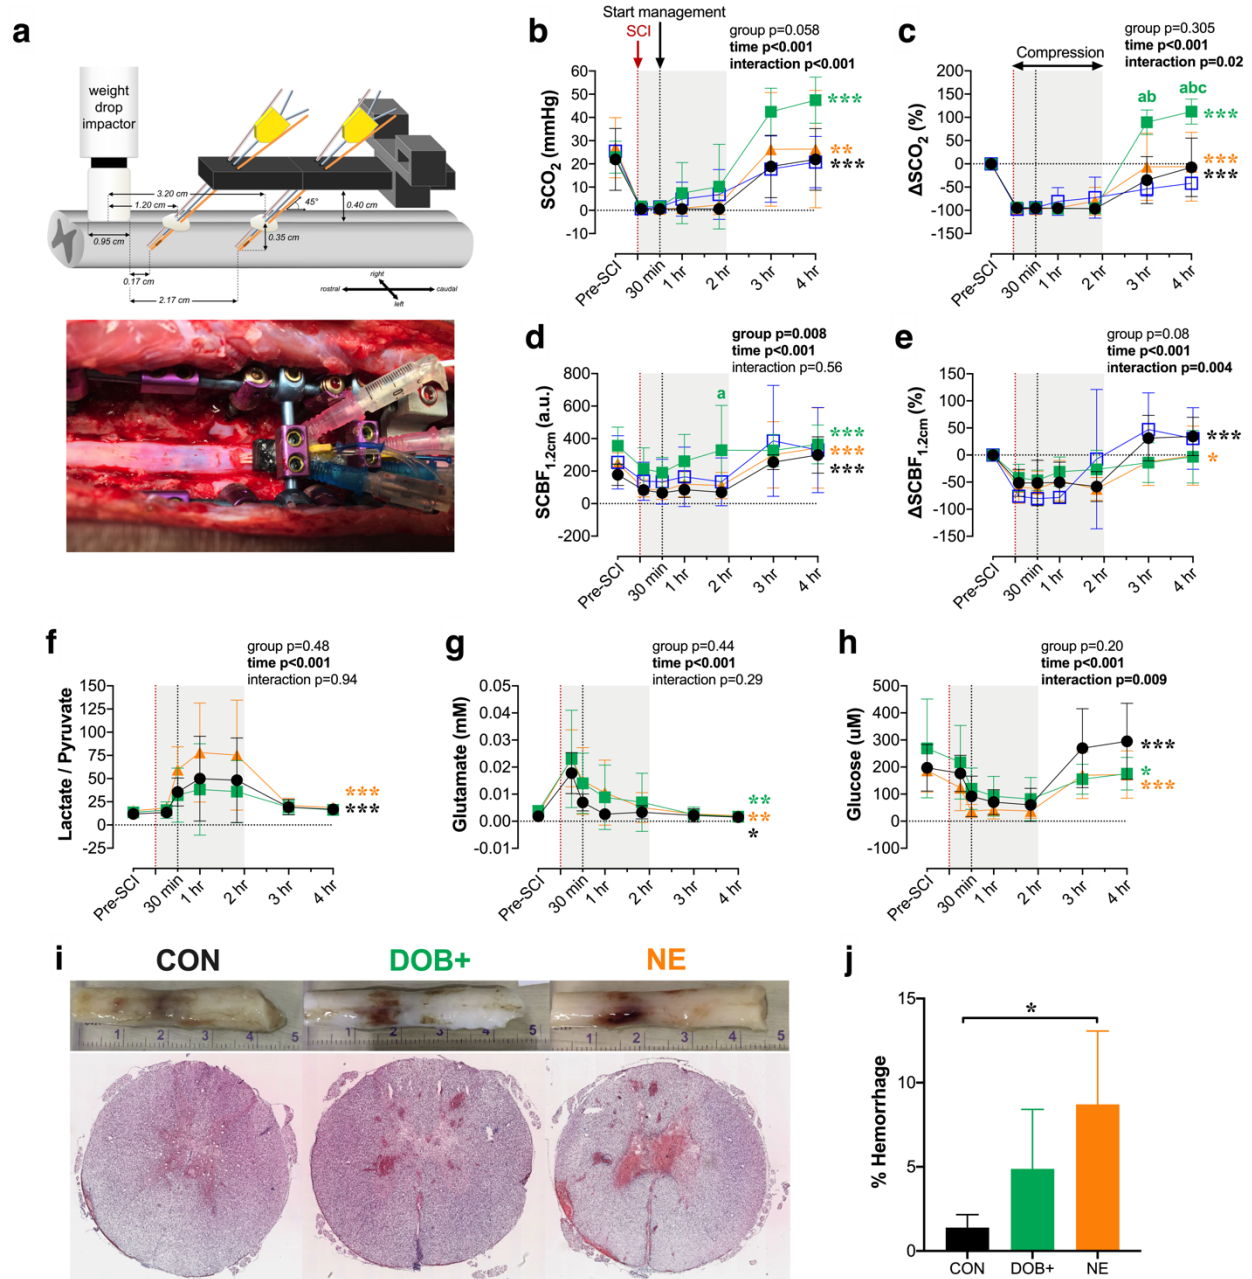

599

600 **Figure 4.** Impact of hemodynamic management on spinal cord oxygenation (SCO<sub>2</sub>), blood flow  
 601 (SCBF), metabolism and hemorrhage acutely post-SCI. (a) Setup for intraparenchymal  
 602 monitoring. A fixation device is secured to the spinal column and probes are inserted through the  
 603 dura 1.2 cm and 3.2 cm away from the center of the impactor. All data are shown for 1.2 cm probes.  
 604 Data from 3.2 cm probes are provided in Supplemental Table S2d. (b) Improvements to SCO<sub>2</sub>



605 occur after decompression (i.e. 2 hours post-SCI), but are most pronounced in DOB+. **(c)** When  
606 expressed as a percent change from baseline,  $\Delta\text{SCO}_2$  is significantly augmented in DOB+  
607 compared to all groups by 4 hours post-SCI. **(d)** SCBF is augmented in CON, NE and DOB+  
608 following decompression, and DOB+ notably had augmented absolute SCBF at 2 hours post-SCI.  
609 **(e)** However, when expressed as percent change from baseline, SCBF was only altered in CON  
610 and NE over the treatment period. **(f)** The lactate/pyruvate ratio does not increase after  
611 management onset (i.e. 30 mins post-SCI) with DOB+, but is increased in NE and CON. **(g)** In all  
612 groups, glutamate becomes progressively reduced and **(h)** glucose is increased following  
613 decompression (i.e. 2 hours post-SCI). Sufficient microdialysis data were only acquired in  $n=2$  for  
614 DOB-, thus DOB- data were excluded from analyses. **(i)** Representative cords and histological  
615 stains show pronounced hemorrhaging with NE. **(j)** Animals receiving NE have augmented  
616 hemorrhaging at the injury epicentre, which is mitigated by DOB+. See Figure 3 for statistical  
617 analyses, additional abbreviations and colour legends. \* $p<0.05$ , \*\* $p<0.01$ , \*\*\* $p<0.001$ . <sup>a</sup>  $p<0.05$   
618 vs CON; <sup>b</sup>  $p<0.05$  vs DOB- ; <sup>c</sup>  $p<0.05$  vs NE.

619

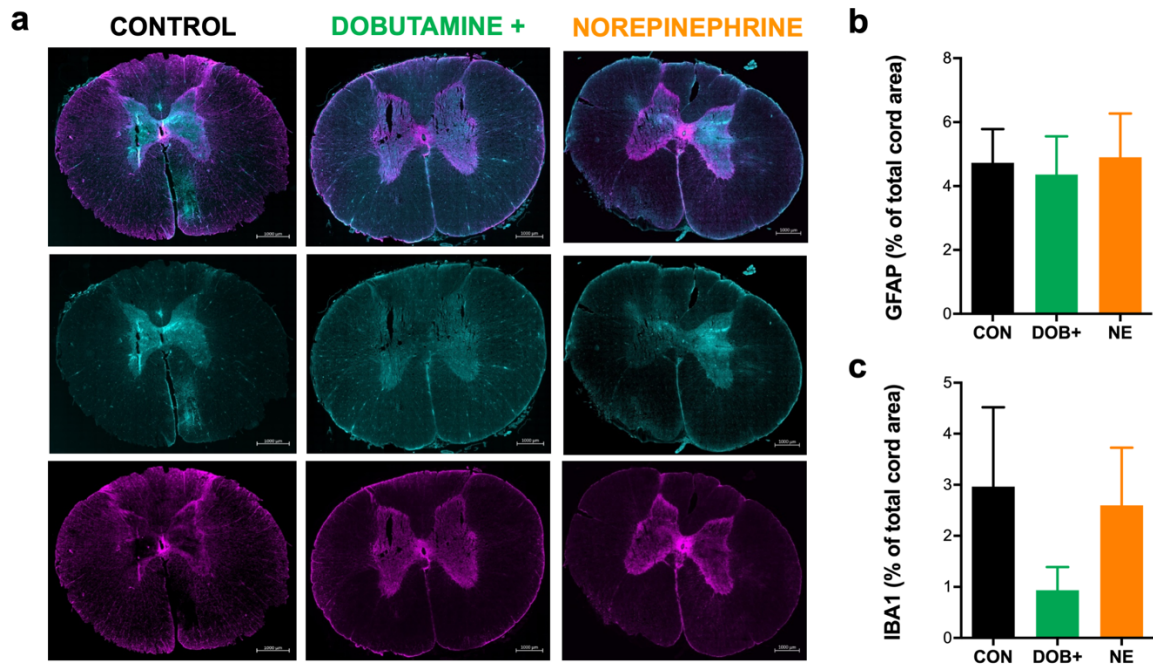

620

621 **Figure 5.** Immunohistochemical analyses of glial (GFAP+) and inflammatory activation (IBA1+)  
622 in the acutely injured spinal cord epicentre. (a) Representative images are shown for control (left)  
623 animals, and animals receiving hemodynamic management with high-dose dobutamine (middle)  
624 and norepinephrine (right). Merged stains (top) are shown for ionized calcium binding adaptor  
625 molecule 1 (IBA1+, bottom) and glial fibrillary acidic protein (GFAP+, middle). Group data are  
626 shown for immunohistochemical analyses of IBA1 (b) and GFAP (c). Bars represent means  $\pm$   
627 standard deviations (SD). No significant differences were detected between animals in control  
628 (CON), high-dose dobutamine (DOB+) and norepinephrine (NE) groups.  $n=4$  per group for  
629 immunohistochemical analyses.
